1 **Title:** Missing data and missed infections: Investigating racial and ethnic disparities in SARS-CoV-2  
2 testing and infection rates in Holyoke, Massachusetts

3  
4 **Authors:** Sara M. Sauer<sup>1\*</sup>, Isabel R. Fulcher<sup>1,2\*</sup>, Wilfredo R. Matias<sup>3,4,5\*</sup>, Ryan Paxton<sup>6</sup>, Ahmed  
5 Elnaïem<sup>5</sup>, Sean Gonsalves<sup>6</sup>, Jack Zhu<sup>4</sup>, Yodeline Guillaume<sup>4</sup>, Molly Franke<sup>1</sup>, Louise C. Ivers<sup>1,3,4,7</sup>

6  
7 <sup>1</sup> Department of Global Health and Social Medicine, Harvard Medical School, Boston, MA

8 <sup>2</sup> Harvard Data Science Initiative, Cambridge, MA

9 <sup>3</sup> Division of Infectious Diseases, Massachusetts General Hospital, Boston, MA

10 <sup>4</sup> Center for Global Health, Massachusetts General Hospital, Boston, MA

11 <sup>5</sup> Division of Global Health Equity, Brigham and Women's Hospital, Boston, MA

12 <sup>6</sup> Holyoke Board of Health, Holyoke, MA

13 <sup>7</sup> Harvard Global Health Institute, Cambridge, MA

14 \* *Contributed Equally*

15  
16  
17 **Key words:** COVID-19; missing data; multiple imputation; bias; health disparities

18  
19  
20  
21  
22  
23  
24  
25  
26  
27  
28  
29  
30  
31  
32  
33  
34  
35  
36  
37  
38  
39  
40  
41  
42 **Abstract**

43  
44 Routinely collected testing data has been a vital resource for public health response during the COVID-

45 19 pandemic and has revealed the extent to which Black and Hispanic persons have borne a

46 disproportionate burden of SARS-CoV-2 infections and hospitalizations in the United States. However,  
47 missing race and ethnicity data and missed infections due to testing disparities limit the interpretation of  
48 testing data and obscure the true toll of the pandemic. We investigated potential bias arising from these  
49 two types of missing data through a case study in Holyoke, Massachusetts during the pre-vaccination  
50 phase of the pandemic. First, we estimated SARS-CoV-2 testing and case rates by race/ethnicity,  
51 imputing missing data using a joint modelling approach. We then investigated disparities in SARS-CoV-  
52 2 reported case rates and missed infections by comparing case rate estimates to estimates derived from a  
53 COVID-19 seroprevalence survey. Compared to the non-Hispanic white population, we found that the  
54 Hispanic population had similar testing rates (476 vs. 480 tested per 1,000) but twice the case rate (8.1%  
55 vs. 3.7%). We found evidence of inequitable testing, with a higher rate of missed infections in the  
56 Hispanic population compared to the non-Hispanic white population (77 vs. 58 infections missed per  
57 1,000).  
58

## 59 **BACKGROUND**

60 Research has demonstrated the disproportionate impact of the COVID-19 pandemic on Black,  
61 Indigenous, and Hispanic populations in the United States [1-3]. These communities experienced higher  
62 rates of SARS-CoV-2 infection, hospitalization, and COVID-19-related mortality compared to non-  
63 Hispanic white populations [4-11] – a result of structural racism, whereby systems, policies, and  
64 practices have created racial inequities in employment, housing, healthcare, and wealth [12]. Routinely  
65 collected COVID-19 testing data has been a vital resource to investigate racial and ethnic disparities in  
66 COVID-19-related outcomes. However, a full understanding has been limited by incomplete race and  
67 ethnicity data [13] and the absence of data for infected, but untested, individuals [3].

68 Missing data on race and ethnicity is common in US COVID-19 testing databases [13,14]. As of  
69 August 1, 2020, US laboratories were required to report race and ethnicity for all COVID-19 tests [15].  
70 Despite this, 32% of reported cases had missing information on race and 42% on ethnicity between  
71 August 1 and December 31, 2020 [16]. Recent studies investigating racial and ethnic disparities  
72 typically exclude participants with missing information or group them into an “unknown” category for  
73 analysis [3,17]. This can underestimate population-level testing and case rates by race and ethnicity and  
74 may bias comparisons across subpopulations when information is not missing completely at random  
75 [18].

76 Missed infections occur when persons infected with SARS-CoV-2 are not documented in testing  
77 databases. Current evidence suggests that 60% of cases in the US were unreported during the first year  
78 of the pandemic [19]. The reasons for this are myriad. A large proportion of SARS-CoV-2 infections are  
79 asymptomatic [20]. Access to laboratory testing throughout the pandemic has been variable and often  
80 limited [21,22]. Furthermore, racial and ethnic disparities in COVID-19 testing stemming from  
81 structural racism have been documented [11]. For example, a study demonstrated the extent to which

82 Black and Hispanic residents living in highly segregated US cities had lower access to COVID-19  
83 testing sites in the early months of the pandemic [23]. Inequities in testing will be propagated into  
84 testing databases, resulting in selection bias and hindering our ability to quantify the true toll of the  
85 pandemic among certain populations.

86 In this study, we investigate racial and ethnic disparities in SARS-CoV-2 testing and cases in  
87 Holyoke, Massachusetts from March 8 to December 31, 2020. We address potential bias due to missing  
88 race and ethnicity data through multiple imputation and investigate missed infections and the impact of  
89 selection bias by comparing routinely collected testing data with a population-representative  
90 seroprevalence study of antibodies to COVID-19 conducted over the study period in Holyoke [24].

91

## 92 **METHODS**

93 *Study setting.* Holyoke is a post-industrial city in western Massachusetts with a population of 40,241 in  
94 2019 [25]. Holyoke is in Hampden County, which has the highest level of social vulnerability in  
95 Massachusetts per the US Centers for Disease Control and Prevention (CDC)'s social vulnerability  
96 index (SVI), an index that uses US census data to determine the relative potential negative effects on  
97 census tracts caused by external stress on human health such as disease outbreaks [26]. Over half of the  
98 population identifies as Hispanic or Latino/a/x, while the remaining population is predominantly non-  
99 Hispanic white (Table 1). The non-Hispanic white community primarily resides in areas of lower SVI  
100 farther from the city center, with Hispanic or Latino/a/x populations residing in the city center in areas  
101 of higher SVI (Figure 1, Supplemental Table 1) [27]. We use the term “Hispanic” to refer to the  
102 “Hispanic or Latino/a/x” population for the remainder of the paper.

103

104 *Data sources.* The main data source in this study is the Holyoke COVID-19 testing database, which

105 includes individual-level information on all COVID-19 tests of individuals residing in Holyoke,  
106 Massachusetts. The city-level COVID-19 testing data was managed by Massachusetts Virtual  
107 Epidemiologic Network (MAVEN), the state's epidemiologic data system [28]. The data extracted for  
108 this analysis did not contain names or phone numbers.

109 We also utilized data from a seroprevalence survey of COVID-19 conducted from November 6  
110 to December 31, 2020 among residents from a simple random sample of Holyoke households [24]. The  
111 study collected demographic information in addition to blood samples for serologic testing of COVID-  
112 19 antibodies from 328 individuals. The seroprevalence survey only reported seroprevalence estimates  
113 among Hispanic and non-Hispanic white groups due to small sample sizes among other racial and ethnic  
114 groups. Lastly, we used an address list for Holyoke (current as of June 2020) to map addresses to census  
115 tracts. This list was also used for household sampling in the seroprevalence study.

116 This study received approval from the Mass General Brigham Institutional Review Board  
117 (Protocol #2021P001714) and the Harvard Institutional Review Board (IRB20-1300).

118

119 ***Study population.*** We utilized all available data from March 8, 2020 through March 8, 2021 (26,487  
120 individuals with 97,049 tests) to impute missing data. After imputation, to facilitate comparisons  
121 between Holyoke testing data and the seroprevalence survey, we excluded testing data for Holyoke  
122 residents who did not receive at least one reverse transcriptase polymerase chain reaction (PCR) test  
123 between March 8 and December 31, 2020. We removed individuals residing in the ten long-term care  
124 facilities that were also excluded from the seroprevalence survey. Our final sample size included 19,658  
125 individuals with 50,075 tests. See Supplemental Materials for details regarding data cleaning.

126

127 ***Key Variables.***

128 Non-missing data from the testing database were leveraged to impute missing race and ethnicity.  
129 We derived variables related to the individual, the individual’s residence, and the individual’s test  
130 provider(s) (i.e. the name of the individual(s) who ordered the COVID-19 test).

131 Individual-level variables constructed from the testing data included: 1) Age at first test,  
132 categorized as <19, 20-44, 45-59, 60-85, and 85+ years. 2) Gender, categorized as male, female, and  
133 grouped gender. Grouped gender included individuals identifying as transgender or with unknown  
134 gender, and was created because of insufficient information to appropriately impute unknown gender  
135 and because the small number of self-identified transgender individuals (<10) precluded valid inference.  
136 3) Race, collapsed into white, Black, Asian, and grouped race (other, two or more races, Native Alaskan  
137 or American Indian, Native Hawaiian or Pacific Islander) and Hispanic ethnicity. Grouped race was  
138 created for categories where the small sample size precluded valid inference or imputation convergence.  
139 A combined race and ethnicity categorical variable was constructed for analyses: Hispanic (any race),  
140 non-Hispanic white, non-Hispanic Black, non-Hispanic Asian, and non-Hispanic grouped race  
141 (Supplemental Materials).

142 Individual-level variables also included individuals’ testing characteristics. We created a variable  
143 for total number of PCR tests received and the number of weeks between March 8, 2020 and the  
144 individuals’ first COVID-19-related test, including PCR, rapid antigen, or antibody tests. We also  
145 created indicator variables for whether the individual ever had a positive PCR test result, received an  
146 antibody test and received an antigen test.

147 We analyzed four residence variables. First, an indicator for living in an apartment was created  
148 based on the existence of apartment numbers in the street address. Second, we mapped addresses to their  
149 respective census tracts and constructed a three-level categorical variable based on the proportion of  
150 individuals in each census tract identifying as “Hispanic” in the 2019 census: 1) high Hispanic

151 proportion (>75%), 2) medium Hispanic proportion (25-75%), and 3) low Hispanic proportion (<25%).  
152 Third, using the census-address mapping, we constructed a binary variable indicating high social  
153 vulnerability (cutoff of 75<sup>th</sup> percentile) based on the CDC's SVI. Finally, we created a household  
154 identifier that grouped individuals with the same addresses.

155 Finally, we created variables to capture the distribution of race and ethnicity for a given testing  
156 provider, known as the *testing provider race and Hispanic ethnicity majority variables*, as testing  
157 providers who order tests for a large proportion of patients with a given race or ethnicity (determined  
158 through comparison to the Holyoke census population distribution) could be informative for imputing  
159 missing race and ethnicity data. See the Supplemental Materials for details on the construction of these  
160 variables.

161

#### 162 ***Outcome measures.***

163 Outcome measures were the positivity rate, case rate, and number of missed infections. *Positivity rate* is  
164 the number of people with at least one positive PCR test divided by the number of people who received  
165 at least one PCR test. *Case rate* refers to the number of people with at least one positive PCR test  
166 divided by the population of Holyoke. The number of *missed infections* is the difference between the  
167 case rate and the true SARS-CoV-2 infection rate, which is estimated from the seroepidemiologic  
168 survey. All outcomes correspond to March 8 through December 31, 2020.

169

#### 170 ***Statistical methods.***

171 Multiple imputation to address missing race and ethnicity data. For individuals with missing race and/or  
172 ethnicity in the testing data, we conducted multi-level multiple imputation to account for clustering by  
173 household of residence using the R `jomo` package [29]. `jomo` uses a joint modelling approach to

174 impute missing information, and incorporates clustering through random intercepts. Addressing the  
175 clustering of race and ethnicity enables us to utilize the racial and ethnic make-up of an individual's  
176 household when imputing their missing information. The completely observed covariates included in the  
177 imputation model were the number of PCR tests; indicators for prior positive PCR test result, prior  
178 antibody test, and prior antigen test; time to first test (weeks); household type (house, apartment, long-  
179 term care facility); census tract category; gender; and testing provider race and Hispanic ethnicity  
180 majority variables. Race and ethnicity were imputed separately, then combined into the race and  
181 ethnicity categorical variable described previously. The small number missing age values were also  
182 imputed.

183         We created twenty imputed datasets and used Rubin's rules to obtain variance estimates for all  
184 estimates obtained in the multiple imputation procedure. As the testing data is a population-level data  
185 source, the only uncertainty comes from the imputation procedure itself, such that the within-imputation  
186 variance term in Rubin's rules vanishes.

187

188 Assessing disparities in testing, accounting for missing race and ethnicity data. We compared the  
189 distribution of race and ethnicity, age, gender, and SVI between the Holyoke population (from the 2019  
190 American Community Survey (ACS) [27]) and the individuals who received at least one COVID-19 test  
191 in the imputed testing data, to assess disparities in testing by demographic characteristics. This was done  
192 for each variable/category by conducting two-sided one-sample t-tests with the null hypothesis that the  
193 observed proportion in the imputed testing data is equal to the Holyoke population proportion, and the  
194 variance estimated using Rubin's rules. Next, we investigated the impact of missing data in the testing  
195 database by comparing the distribution of these characteristics between the original and imputed testing  
196 data. Finally, using the imputed data, we compared testing characteristics (number of PCR tests, days to



197 first PCR test, received antibody test) by race and ethnicity categories for individuals in the testing  
198 dataset.

199

200 Assessing disparities in infection, accounting for missing race and ethnicity data. We computed the  
201 positivity and case rate for each race and ethnicity category among the original testing population  
202 (excluding or separating individuals with unknown race and ethnicity category) and the imputed testing  
203 population (all individuals who received a test in Holyoke). This enables a comparison in rates between  
204 what is typically shown on COVID-19 data dashboards (“original”), which separates (for positivity  
205 rates) or excludes (for case rates) individuals with missing race and/or ethnicity, and what would be  
206 expected if there was no missing data (“imputed”). To examine the impact of missing data on disparities  
207 in infection, we also computed the positivity and case rate ratios between the Hispanic and non-Hispanic  
208 white population using both the imputed and the original testing data. A rate ratio over 1 suggests that  
209 the positivity (case) rate in the Hispanic population is higher than that in the non-Hispanic white  
210 population. To assess the impact of missing data by where individuals live, we repeated the above  
211 analysis by SVI.

212

213 Assessing disparities in missed infections, accounting for missing race and ethnicity data and potentially  
214 disparate testing rates. We computed the number of missed infections per 1000 individuals in each race  
215 and ethnicity category by taking the difference between the case rate from the imputed testing data and  
216 the estimated seroprevalence from the seroepidemiologic study. Seroprevalence is the proportion of the  
217 population with IgG antibodies and represents the best estimation for the proportion of the Holyoke  
218 population with a SARS-CoV-2 infection by December 31, 2020. Missed infections may be preferable  
219 over other metrics to assess disparities because this quantity incorporates disparities in case rates and

220 disparities in testing. That is, missed infections may occur in the presence of disparate case rates and  
221 equal testing rates, equal case rates and disparate testing rates, or both. If case rates are disparate, testing  
222 rates must be correspondingly higher in the most-affected group to avoid missed infections. We  
223 constructed 95% credible intervals (CI's) for the rate of missed infections in each race and ethnicity  
224 category using a parametric bootstrap procedure. Again, we repeated the above analysis by SVI to  
225 determine the impact of missed infections by location of residence .

226

## 227 **RESULTS**

228 In the Holyoke testing population, 23.0% individuals had an unknown race and ethnicity category  
229 (n=4531), with 21.8% (n=4286) missing race, 19.7% (n=3869) missing ethnicity, and <1% missing age  
230 (n=14) (Table 1). Individuals with missing race and/or ethnicity were more likely to reside in low SVI  
231 census tracts, be under the age of 45 or over 84, have a lower total number of PCR tests, have an earlier  
232 week of first test, and live in a house vs an apartment. These individuals were less likely to have had an  
233 antibody test or to have ever tested positive (Supplemental Table 2).

234

235 After imputing race and ethnicity, the size of the non-Hispanic Asian population in the imputed testing  
236 data was slightly larger than the Holyoke population, leading to a significantly larger proportion of non-  
237 Hispanic Asian individuals in the imputed testing data. Further, we found significant, but not meaningful  
238 differences (all <1%) in all racial and ethnic categories between individuals who received at least one  
239 test and the Holyoke population. The distribution of SVI was similar between the Holyoke population  
240 and the imputed testing data. Individuals under 19 years and males were underrepresented in the  
241 imputed testing data compared to the city population, while individuals aged 20-44 were  
242 overrepresented.

243

244 Disparities in testing. Testing rates were similar between non-Hispanic white and Hispanic populations  
245 with 476 compared to 480 per 1,000 individuals receiving at least one test by December 31, 2020. The  
246 median number of tests per individual was two with 49% of the Holyoke population having received at  
247 least one test during this period; there was no difference between the Hispanic and the non-Hispanic  
248 white population in terms of number of tests. Among those who received a test, the median time to first  
249 PCR test was 213 days from March 8, 2020, with Hispanic individuals having slightly longer time to  
250 first test (222 vs. 204 days among non-Hispanic white individuals) (Table 2). Antibody tests were most  
251 common among the non-Hispanic white population (3.2% had received an antibody test), while only  
252 1.5% of Hispanic individuals received an antibody test (Table 2). There were no discernible trends by  
253 census tracts or density of Hispanic population in the number of PCR tests received over time (Figure 2).

254

255 Disparities in infection. The SARS-CoV-2 test positivity rate between March 8 and December 31, 2020  
256 was 12.6%, corresponding to a case rate for Holyoke of 6.2%. The Hispanic population had higher  
257 positivity (16.9%) and case (8.1%) rates compared to the non-Hispanic white population (7.8% and  
258 3.7%, respectively). Analyses using testing data with a separate category for “unknown” race or  
259 ethnicity, yielded a higher positivity rate across all race and ethnicity categories compared to the  
260 imputed population (Table 3). Notably, the positivity rate among the unknown group was lower than the  
261 complete case Holyoke population (3.4% vs. 15.4%). The case rates, while lower in the original testing  
262 data compared to those in the imputed population, were similar, as individuals with at least one positive  
263 SARS-CoV-2 test were less likely to have missing race and ethnicity than tested individuals who never  
264 had a positive SARS-CoV-2 test (7% and 12% missing, respectively); this is likely due to follow-up  
265 contact tracing efforts among confirmed cases. When computed using the imputed data, both the

266 positivity and case rate ratios between Hispanic and non-Hispanic white individuals were 2.2 (2.0, 2.4),  
267 which was close to the estimated computed using original testing data (Table 3). Findings stratified by  
268 SVI were similar (Supplemental Table 3).

269  
270 Disparities in missed infections. To understand how any disparities in testing could have influenced case  
271 detection, we compared the case rates derived from the testing data to the seroprevalence survey. The  
272 prevalence of SARS-CoV-2 infection as measured by IgG antibodies was estimated to be 13.1% (6.9%,  
273 22.3%) in the seroprevalence survey compared to 6.2% case rate in the testing data, meaning that an  
274 estimated 51.8% (9.2%, 71.9%) of Holyoke SARS-CoV-2 infections were not captured in the testing  
275 data [24]. This represents about 2,682 missed SARS-CoV-2 infections, or 67 missed infections per 1,000  
276 people (Table 4). Among the Hispanic population, the estimated seroprevalence was 16.1% (6.2%,  
277 31.8%) compared to an 8.1% case rate in the testing data, representing about 77 (0, 223) missed SARS-  
278 CoV-2 infections per 1,000 people. Among the non-Hispanic white population, the estimated  
279 seroprevalence was 9.4% (4.6%, 16.4%) compared to 3.7% in the testing data, representing about 58 (8,  
280 124) missed infections per 1,000 people. There was a higher rate of missed cases overall, as well as a  
281 larger difference in Hispanic and non-Hispanic white-specific rates, among residents of high vs low SVI  
282 census tracts (Supplemental Table 4).

283

## 284 **DISCUSSION**

285 In this study, we combined routinely collected public health data with rigorous statistical  
286 methodology and a representative seroprevalence survey to identify disparities in SARS-CoV-2 testing  
287 and case rates by race and ethnicity in Holyoke, MA. We highlighted how missing data (due to an  
288 absence of race/ethnicity data or undetected infection) may bias these estimates.

289           The positivity and case rate among Holyoke’s Hispanic population were nearly double that of the  
290 non-Hispanic white population, revealing a disproportionate burden of SARS-CoV-2 in this population.  
291 Other studies have similarly found higher risk of infection among the US Hispanic population [5-8].  
292 Testing rates were similar by race and ethnicity. This finding contrasts with other studies in  
293 Massachusetts and nationally [21-23]. Similar testing rates may be explained by the presence of two  
294 "Stop the Spread" sites, public, free-of-charge mass-testing sites deployed in Massachusetts during the  
295 early phases of the pandemic. However, equality in testing rates does not necessarily translate to  
296 equitable testing. Higher positivity and case rates indicate a need for a higher testing rate in the Hispanic  
297 population. A higher rate of missed infections in this population, suggests that, though equal, the rate of  
298 testing in the Hispanic population was inadequate given the greater burden of infection. Missed SARS-  
299 CoV-2 infections preclude opportunities to reduce onward transmission, and contribute to the spread of  
300 infections within these communities, further driving inequities. If perpetuated into the era of ‘test and  
301 treat’, missed infections may result in missed opportunities to reduce morbidity and other mortality. The  
302 reasons underlying this testing inequity likely stem from structural barriers, that limit access to  
303 healthcare even when health sites are present such as: incomplete language accessibility of messaging  
304 related to Covid-19 testing, including messaging regarding cost and insurance requirements, inflexible  
305 employer sick leave policies contributing to fear of testing positive, fear of deportation amongst  
306 undocumented individuals, and long wait times at testing centers, even at Stop the Spread sites where  
307 demand was heightened by the influx of people coming from neighboring locales to get tested [30].

308           Positivity rates were higher and case rates were lower in the complete cases testing data  
309 compared to those in the imputed data, due to the lower rate of missing race and ethnicity information  
310 among cases compared to tested individuals who never had a positive SARS-CoV-2 test. Although our  
311 estimates of *disparities* in infection rates (positivity/case rate ratios) were not meaningfully impacted by

312 missing data, this is due to the nature of missingness in this study; other studies have shown a substantial  
313 impact on findings, underscoring the importance of appropriately accounting for missing data to more  
314 accurately inform targeted public health responses [18, 31].

315 Over half of the cases were not captured by the testing data, highlighting the role that bias may  
316 play if public health officials focus on testing data only [32-33]. Case rates from testing data alone will  
317 greatly underestimate the true burden of SARS-CoV-2 infections. Testing data may still be useful for  
318 comparing health outcomes between groups if the testing population is representative of the total  
319 population. If not representative, the presence of selection bias should be evaluated and addressed [32-  
320 35].

321 We utilized a multi-level multiple imputation procedure that allowed us to impute race and  
322 ethnicity separately, and to account for clustering of race and ethnicity by household. Two potential  
323 limitations of this procedure are that it assumes that the data are missing at random (MAR) [29], and that  
324 the imputation model is correctly specified; when these assumptions do not hold, resulting estimates  
325 may be biased. All variables included our imputation model were significantly associated with  
326 missingness in the race and ethnicity variable (Supplemental Table 2), though we did not have access to  
327 other potentially informative data such as individuals' occupation, which may threaten the MAR  
328 assumption. Future health data systems would benefit from collecting more information on  
329 characteristics known to be associated with race and ethnicity. Other imputation procedures such as  
330 Bayesian Improved Surname Geocoding (BISG) [18,36] or population calibrated multiple imputation  
331 (PCMI) [37] could be employed, however, these require access to individuals' surnames or knowledge  
332 of the true testing race and ethnicity distribution, respectively, neither of which we had access to in the  
333 current study. Ultimately, the most appropriate strategy will depend on the available information.

334 This study has several limitations: First, we grouped American Indian and Alaskan Native and  
335 Native Hawaiian and Pacific Islander into a “grouped” race category because the number of individuals  
336 was very small. Grouping race categories this way will mask true differences between groups and may  
337 further marginalize these communities [38]. Second, there was no standardized method of collecting  
338 race or ethnicity information at testing facilities. Prior research has shown that differences in the  
339 ordering and question format for race and ethnicity data can result in inconsistent answers [39, 40].  
340 Misclassifications at the outset would propagate into the multiple imputation procedure. We attempted  
341 to mitigate this through our data cleaning process, which was informed by discussions with Holyoke  
342 testing sites about how race and ethnicity data was collected. Third, there was no standardized method of  
343 collecting gender at testing facilities. The testing data only had options for “male”, “female”, and  
344 “transgender” with only 6 (0.03%) individuals listed as transgender, over ten-fold smaller than the  
345 estimated percentage of transgender individuals living in Massachusetts [41]. This could be due to either  
346 a disparity in testing by gender or an artefact of non-standardized data collection on gender. These data  
347 issues can be obviated by instituting standardized data collection procedures at testing facilities. Finally,  
348 the seroprevalence survey used to estimate the true infection rates was itself subject to several  
349 limitations [24]; in this study, these manifested as insufficient data to estimate missed infection rates  
350 among all race and ethnicity groups, and wide CIs in groups where estimation was possible. Despite  
351 these limitations, our analysis can serve as an example of how to investigate where and how racial and  
352 ethnic disparities may lead to differential testing rates, case rates, and missed infections.

353 Routinely collected testing data is a vital resource for targeting public health responses. In this  
354 study, we highlight a disproportionate burden of SARS-COV-2 infections among the Hispanic  
355 population in Holyoke and an inequity in testing between Hispanic and non-Hispanic white populations.  
356 We address biases inherent to analyses using routinely collected testing data by using multiple

357 imputation of missing data and comparing the testing data to a representative seroprevalence survey.  
358 While the statistical procedures presented in this paper enhance rigor, they are no substitute for  
359 consistent data quality and coordinated, integrated data systems, which are needed to uncover the true  
360 burden of the COVID-19 pandemic by demographic characteristics, and to guide an equitable response  
361 to the pandemic.

362

363 **Acknowledgements:** We thank the rest of the Holyoke Board of Health, who supported this study. We  
364 are also grateful to Scott Troppy and Reed Sherrill from the Massachusetts Department of Public Health  
365 for their assistance with organizing and understanding the primary data source.

366

367

368

369



## 370 References

- 371
- 372 1. Magesh S, John D, Li WT, et al. Disparities in COVID-19 Outcomes by Race, Ethnicity, and
- 373 Socioeconomic Status: A Systematic-Review and Meta-analysis. *JAMA Netw Open*. 2021 Nov
- 374 1;4(11):e2134147. doi: 10.1001/jamanetworkopen.2021.34147. Erratum in: *JAMA Netw Open*.
- 375 2021 Dec 1;4(12):e2144237. Erratum in: *JAMA Netw Open*. 2022 Feb 1;5(2):e222170. PMID:
- 376 34762110; PMCID: PMC8586903.
- 377 2. Sze S, Pan D, Nevill CR, et al. Ethnicity and Clinical Outcomes in COVID-19: A Systematic
- 378 Review and Meta-Analysis. *EClinicalMedicine*. 2020;29:100630.
- 379 doi:10.1016/j.eclinm.2020.100630
- 380 3. Mackey K, Ayers CK, Kondo KK, et al. Racial and Ethnic Disparities in COVID-19-Related
- 381 Infections, Hospitalizations, and Deaths: A Systematic Review. *Ann Intern Med*.
- 382 2021;174(3):362-373. doi:10.7326/M20-6306
- 383 4. Zelner J, Trangucci R, Narahariseti R, et al. Racial Disparities in Coronavirus Disease 2019
- 384 (COVID-19) Mortality Are Driven by Unequal Infection Risks. *Clinical Infectious Diseases*.
- 385 2021;72(5):e88-e95. doi:10.1093/cid/ciaa1723
- 386 5. Tai DBG, Shah A, Doubeni CA, Sia IG, Wieland ML. The Disproportionate Impact of COVID-
- 387 19 on Racial and Ethnic Minorities in the United States. *Clin Infect Dis*. 2021;72(4):703-706.
- 388 doi:10.1093/cid/ciaa815
- 389 6. Reitsma MB, Claypool AL, Vargo J, et al. Racial/Ethnic Disparities In COVID-19 Exposure
- 390 Risk, Testing, And Cases At The Subcounty Level In California. *Health Aff (Millwood)*.
- 391 2021;40(6):870-878. doi:10.1377/hlthaff.2021.00098
- 392 7. Moore JT, Ricaldi JN, Rose CE, et al. Disparities in Incidence of COVID-19 Among
- 393 Underrepresented Racial/Ethnic Groups in Counties Identified as Hotspots During June 5-18,
- 394 2020 - 22 States, February-June 2020. *MMWR Morb Mortal Wkly Rep*. 2020;69(33):1122-1126.
- 395 doi:10.15585/mmwr.mm6933e1
- 396 8. Artiga S, Corallo B, Pham O. Racial Disparities in COVID-19: Key Findings from Available
- 397 Data and Analysis. *KFF (Kaiser Fam Found)*. 2020.
- 398 9. Price-Haygood EG, Burton J, et al. Hospitalization and Mortality among Black Patients and
- 399 White Patients with COVID-19. *N Engl J Med*. 2020;382(26):2534-2543. doi:
- 400 10.1056/NEJMsa2011686
- 401 10. Millet GA, Jones AT, Benkeser D, et al. Assessing Differential Impacts of COVID-19 on Black
- 402 Communities. *Ann Epidemiol*. 2020;47:37-44.
- 403 11. Centers for Disease Control and Prevention. Risk of Exposure to COVID-19: Racial and Ethnic
- 404 Health Disparities. 10 December 2020. Available at: [https://www.cdc.gov/coronavirus/2019-](https://www.cdc.gov/coronavirus/2019-ncov/community/health-equity/racial-ethnic-disparities/increased-risk-exposure.html)
- 405 [ncov/community/health-equity/racial-ethnic-disparities/increased-risk-exposure.html](https://www.cdc.gov/coronavirus/2019-ncov/community/health-equity/racial-ethnic-disparities/increased-risk-exposure.html)
- 406 12. Bailey ZD, Krieger N, Agénor M, Graves J, Linos N, Bassett MT. Structural Racism and Health
- 407 Inequities in the USA: Evidence and Interventions. *Lancet*. 2017;389(10077):1453-1463.
- 408 doi:10.1016/S0140-6736(17)30569-X
- 409 13. Noppert GA, Zalla LC. Who Counts and Who Gets Counted? Health Equity in Infectious
- 410 Disease Surveillance. *Am J Public Health*. 2021;111(6):1004-1006.
- 411 doi:10.2105/AJPH.2021.306249
- 412 14. Krieger N, Testa C, Hanage WP, Chen JT. US Racial and Ethnic Data for COVID-19 Cases: Still
- 413 Missing in Action. *Lancet*. 2020:19-20. doi:10.1016/S0140-6736(20)32220-0.

- 414 15. Weiland N, Mandavalli A. Trump Administration sets demographic requirements for coronavirus  
415 reports. 4 June 2020. Available at: [https://www.nytimes.com/2020/06/04/us/politics/coronavirus-](https://www.nytimes.com/2020/06/04/us/politics/coronavirus-infection-demographics.html?searchResultPosition=2)  
416 [infection-demographics.html?searchResultPosition=2](https://www.nytimes.com/2020/06/04/us/politics/coronavirus-infection-demographics.html?searchResultPosition=2)
- 417 16. The COVID Tracking Project. Racial Data Dashboard. Accessed on 29 November 2021.  
418 Available at: <https://covidtracking.com/race/dashboard>
- 419 17. Yoon P, Hall J, Fuld J, et al. Alternative Methods for Grouping Race and Ethnicity to Monitor  
420 COVID-19 Outcomes and Vaccination Coverage. *MMWR Morb Mortal Wkly Rep.* 2021; 70:  
421 1075-1080. <https://doi.org/10.15585/mmwr.mm7032a2>
- 422 18. Labgold K, Hamid S, Shah S, et al. Estimating the Unknown: Greater Racial and Ethnic  
423 Disparities in COVID-19 Burden After Accounting for Missing Race and Ethnicity  
424 Data. *Epidemiology.* 2021;32(2):157-161. doi:10.1097/EDE.0000000000001314
- 425 19. Irons NJ, Raftery AE. Estimating SARS-CoV-2 infections from deaths, confirmed cases, tests,  
426 and random surveys. *Proc Natl Acad Sci USA.* 2021;118(31):e2103272118.  
427 doi:10.1073/pnas.2103272118
- 428 20. Ma Q, Liu J, Liu Q, et al. Global Percentage of Asymptomatic SARS-CoV-2 Infections Among  
429 the Tested Population and Individuals With Confirmed COVID-19 Diagnosis: A Systematic  
430 Review and Meta-analysis. *JAMA Netw Open.* 2021;4(12):e2137257. Published 2021 Dec 1.  
431 doi:10.1001/jamanetworkopen.2021.37257
- 432 21. Dryden-Peterson S, Velásquez GE, Stopka TJ, Davey S, Lockman S, Ojikutu BO. Disparities in  
433 SARS-CoV-2 Testing in Massachusetts During the COVID-19 Pandemic [published correction  
434 appears in *JAMA Netw Open.* 2021 Apr 1;4(4):e2110970]. *JAMA Netw Open.*  
435 2021;4(2):e2037067. Published 2021 Feb 1. doi:10.1001/jamanetworkopen.2020.37067
- 436 22. Lieberman-Cribbin W, Alpert N, Flores R, Taioli E. Analyzing Disparities in COVID-19 Testing  
437 Trends According to Risk for COVID-19 Severity across New York City. *BMC Public Health.*  
438 2021;21(1):1717. Published 2021 Sep 21. doi:10.1186/s12889-021-11762-0.
- 439 23. Asabor EN, Warren JL, Cohen T. Racial/Ethnic Segregation and Access to COVID-19 Testing:  
440 Spatial Distribution of COVID-19 Testing Sites in the Four Largest Highly Segregated Cities in  
441 the United States. *Am J Public Health.* 2022;112(3):518-526. doi:10.2105/AJPH.2021.306558
- 442 24. Matias WR, Fulcher IR, Sauer SM, et al. 2021. Disparities in SARS-CoV-2 Infection by Race,  
443 Ethnicity, Language, and Social Vulnerability: Evidence from a Citywide Seroprevalence Study  
444 in Massachusetts, USA." *Journal of Racial and Ethnic Health Disparities.* 2023; 1-11. doi:  
445 10.1007/s40615-022-01502-4
- 446 25. Quick Facts, Holyoke city, Massachusetts. United States Census Bureau.  
447 <https://www.census.gov/quickfacts/holyokecitymassachusetts>. Published 2020.
- 448 26. ATSDR. CDC's Social Vulnerability Index (SVI) Fact Sheet. Available at:  
449 [https://www.atsdr.cdc.gov/placeandhealth/svi/fact\\_sheet/fact\\_sheet.html](https://www.atsdr.cdc.gov/placeandhealth/svi/fact_sheet/fact_sheet.html)
- 450 27. U.S. Census Bureau. American Community Survey, Demographic and Housing Estimates. 2019.  
451 Available at: <https://www.census.gov/programs-surveys/acs>
- 452 28. Troppy S, Haney G, Cocoros N, Cranston K, DeMaria A. Infectious Disease Surveillance in the  
453 21st Century: An Integrated Web-Based Surveillance and Case Management System. *Public*  
454 *Health Rep.* 2014;129(2):132-138. doi:10.1177/003335491412900206.
- 455 29. Quartagno M, Grund, S, Carpenter, J. jomo: A Flexible Package for Two-level Joint Modelling  
456 Multiple Imputation. *The R Journal.* 2019. 11:2, 205-228. [https://journal.r-](https://journal.r-project.org/archive/2019/RJ-2019-028/RJ-2019-028.pdf)  
457 [project.org/archive/2019/RJ-2019-028/RJ-2019-028.pdf](https://journal.r-project.org/archive/2019/RJ-2019-028/RJ-2019-028.pdf)
- 458 30. Lee RM, Handunge VL, Augenbraun SL, Nguyen H, et al. Addressing COVID-19 Testing  
459 Inequities Among Underserved Populations in Massachusetts: A Rapid Qualitative Exploration

- 460 of Health Center Staff, Partner, and Resident Perceptions. *Frontiers in Public Health*. 2022; 10:  
461 838544. doi: 10.3389/fpubh.2022.838544
- 462 31. Zhang G, Charles ER, Zhang Y, et al. Multiple Imputation of Missing Race and Ethnicity in  
463 CDC COVID-19 Case-Level Surveillance Data. *Int J of Stat Med Res*. 2022; 11:1-11. doi:  
464 10.6000/1929-6029.2022.11.01
- 465 32. Griffith GJ, Morris TT, Tudball MJ, et al. Collider Bias Undermines our Understanding of  
466 COVID-19 Disease Risk and Severity. *Nature Communications*. 2020;11(1):5749. Published  
467 2020 Nov 12.
- 468 33. Smith LH. Selection Mechanisms and Their Consequences: Understanding and Addressing  
469 Selection Bias. *Current Epidemiology Reports*. 2020;7:179-189.
- 470 34. Aronow PM, Lee DKK. Interval Estimation of Population Means under Unknown but Bounded  
471 Probabilities of Sample Selection. *Biometrika*. 2013;100(1):235-240.
- 472 35. Smith LH, Vanderweele TJ. Bounding Bias Due to Selection. *Epidemiology*. 2019 Jul;30(4):509-  
473 516. doi: 10.1097/EDE.0000000000001032
- 474 36. Elliott MN, Fremont A, Morrison PA, et al. A New Method for Estimating Race/Ethnicity and  
475 Associated Disparities where Administrative Records Lack Self-Reported Race/Ethnicity. *Health  
476 Serv Res*. 2008; 43(5 P1):1722-1736. doi: 10.1111/j.1475-6773.2008.00854.x
- 477 37. Pham TM, Carpenter JR, Morris TP, et al. Population-Calibrated Multiple Imputation for a  
478 Binary/Categorical Covariate in Categorical Regression Models. *Statistics in Medicine*. 2019;  
479 38:792–808. doi: 10.1002/sim.8004
- 480 38. Flanagin A, Frey T, Christiansen SL. Updated Guidance on Reporting of Race and Ethnicity in  
481 Medical and Science Journals. *JAMA*. 2021; 326(7)621-627.
- 482 39. Patten, E. Who is Multiracial? Depends on How You Ask. (2015) Pew Research Center.  
483 Accessed on 11 January 2022: [https://pewresearch.org/social-trends/2015/11/06/chapter-1-  
484 estimates-of-multiracial-adults-and-other-various-question-formats/](https://pewresearch.org/social-trends/2015/11/06/chapter-1-estimates-of-multiracial-adults-and-other-various-question-formats/)
- 485 40. Spangler KR, Levy JI, Fabian MP, Haley BM, Carnes F, Patil P, Tieskens K, Klevens RM,  
486 Erdman EA, Troppy TS, Leibler JH, Lane KJ. Missing Race and Ethnicity Data among COVID-  
487 19 Cases in Massachusetts. *J Racial Ethn Health Disparities*. 2022 Sep 2:1–10. doi:  
488 10.1007/s40615-022-01387-3.
- 489 41. Flores AR, Herman JL, Gates GJ, and Brown TNT. How Many Adults Identify as Transgender  
490 in the United States? *The Williams Institute*. 2016. Accessed on 8 February 2022:  
491 <https://williamsinstitute.law.ucla.edu/wp-content/uploads/Trans-Adults-US-Aug-2016.pdf>  
492  
493

494 **Table 1.** Holyoke demographic distribution compared to original and imputed testing datasets (March 8,  
495 2020 – December 31, 2020)

|                                                | Holyoke (ACS, 2019)<br><i>n</i> (%) | Citywide Testing: Original<br><i>n</i> (%) | Citywide Testing: Imputed <sup>2</sup><br><i>n</i> (%) | P-value <sup>6</sup> |
|------------------------------------------------|-------------------------------------|--------------------------------------------|--------------------------------------------------------|----------------------|
| <b>Overall</b>                                 | 40241                               | 19658                                      | 19658                                                  |                      |
| <b>Race and ethnicity category</b>             |                                     |                                            |                                                        |                      |
| Hispanic                                       | 21704 (53.9)                        | 8592 (56.8)                                | 10408 (52.9)                                           | 0.026                |
| Non-Hispanic                                   |                                     |                                            |                                                        |                      |
| White                                          | 16636 (41.3)                        | 5880 (38.9)                                | 7917 (40.3)                                            | 0.015                |
| Black                                          | 1162 (2.9)                          | 436 (2.9)                                  | 737 (3.8)                                              | <0.001               |
| Asian                                          | 239 (0.6)                           | 110 (0.7)                                  | 299 <sup>1</sup> (1.5)                                 | <0.001               |
| Grouped race <sup>3</sup>                      | 500 (1.2)                           | 109 (0.7)                                  | 296 (1.5)                                              | 0.014                |
| <i>Missing</i>                                 | --                                  | 4531 (23.0%)                               | --                                                     | --                   |
| <b>Age</b>                                     |                                     |                                            |                                                        |                      |
| 0-19                                           | 10382 (25.8)                        | 3754 (19.1)                                | 3757 (19.1)                                            | <0.001               |
| 20-44                                          | 14366 (35.7)                        | 8001 (40.7)                                | 8007 (40.7)                                            | <0.001               |
| 45-59                                          | 7606 (18.9)                         | 3996 (20.3)                                | 3999 (20.3)                                            | <0.001               |
| 60-84                                          | 7002 (17.4)                         | 3555 (18.1)                                | 3557 (18.1)                                            | 0.012                |
| 85+                                            | 885 (2.2)                           | 338 (1.7)                                  | 338 (1.7)                                              | <0.001               |
| <i>Missing</i>                                 | --                                  | 14 (<1%)                                   | --                                                     | --                   |
| <b>Gender<sup>4</sup></b>                      |                                     |                                            |                                                        |                      |
| Female                                         | 20764 (51.6)                        | 10871 (55.3)                               | 10871 (55.3)                                           | <0.001               |
| Male                                           | 19477 (48.4)                        | 8732 (44.4)                                | 8732 (44.4)                                            | <0.001               |
| Grouped gender <sup>5</sup>                    | --                                  | 55 (<1%)                                   | 55 (<1%)                                               | --                   |
| <b>Census Tract Category</b>                   |                                     |                                            |                                                        |                      |
| High Hispanic                                  | 10701 (26.6)                        | 5333 (27.1)                                | 5333 (27.1)                                            | 0.001                |
| Medium Hispanic                                | 20413 (50.7)                        | 9949 (50.6)                                | 9949 (50.6)                                            | 0.006                |
| Low Hispanic                                   | 9127 (22.7)                         | 4376 (22.3)                                | 4376 (22.3)                                            | 0.845                |
| <b>Social Vulnerability Index</b>              |                                     |                                            |                                                        |                      |
| < 75 <sup>th</sup> percentile in Massachusetts | 9127 (22.7)                         | 4376 (22.3)                                | 4376 (22.3)                                            | 0.845                |
| ≥ 75 <sup>th</sup> percentile in Massachusetts | 31114 (77.3)                        | 15282 (77.7)                               | 15282 (77.7)                                           | 0.845                |

496 <sup>1</sup> Number of individuals classified as non-Hispanic Asian is slightly higher than the Holyoke population (based on ACS  
497 2019).

498 <sup>2</sup> *n* (%) are averaged across M=20 imputed datasets. No measure of uncertainty shown for brevity.

499 <sup>3</sup> Grouped categories group includes other, two or more races, and American Indian or Alaskan Native

500 <sup>4</sup> The information listed for the Holyoke is the “Sex” variable from the ACS 2019 as that was the only question available.

501 <sup>5</sup> “Grouped gender” includes persons identifying as Transgender and persons with Unknown gender. No formal comparison  
502 available as ACS 2019 only includes “Male” and “Female”.

503 <sup>6</sup> P-values correspond two-sided one-sample t-tests with the null hypothesis that the observed proportion in the imputed  
504 testing data is equal to the Holyoke population proportion, and the variance estimated using Rubin’s rules. A statistically  
505 significant p-value for a particular group suggests that this group is under or over represented in the testing data relative to  
506 the Holyoke population.

507 **Table 2.** Holyoke testing characteristics by race/ethnicity category from citywide testing imputed  
508 dataset (March 8, 2020 – December 31, 2020)

|                                                                    | Overall           | Hispanic          | Non-Hispanic      |                   |                   |                   |
|--------------------------------------------------------------------|-------------------|-------------------|-------------------|-------------------|-------------------|-------------------|
|                                                                    |                   |                   | White             | Black             | Asian             | Other             |
| <b>Number of PCR tests per individual median (IQR)<sup>1</sup></b> | 2<br>(1, 3)       | 2<br>(1, 3)       | 2<br>(1, 3)       | 1<br>(1, 2.46)    | 1<br>(1, 2)       | 1<br>(1, 2.64)    |
| <b>Days to first PCR test median (IQR)<sup>1</sup></b>             | 213<br>(145, 256) | 222<br>(151, 258) | 204<br>(143, 252) | 197<br>(128, 245) | 199<br>(125, 244) | 197<br>(130, 246) |
| <b>Ever received antibody test n (%)<sup>1</sup></b>               | 428<br>(2.2)      | 155<br>(1.5)      | 250<br>(3.2)      | 10<br>(1.4)       | 8<br>(2.7)        | 5<br>(1.7)        |

509 <sup>1</sup> Statistics are taken within an imputed dataset and then averaged across the M=20 imputed datasets. No measures of  
510 uncertainty shown for brevity.

511  
512 **Table 3.** Rates of SARS-CoV-2 infection from citywide testing original and imputed data (March 8,  
513 2020 – December 31, 2020)

|                    | Positivity rate |                      | Rate ratio <sup>4</sup> |                      | Case rate <sup>1</sup> |                                 | Rate ratio <sup>4</sup> |                      |
|--------------------|-----------------|----------------------|-------------------------|----------------------|------------------------|---------------------------------|-------------------------|----------------------|
|                    | Original        | Imputed <sup>3</sup> | Original                | Imputed <sup>5</sup> | Original               | Imputed <sup>3</sup>            | Original                | Imputed <sup>5</sup> |
| <b>Overall</b>     | <b>15.4</b>     | <b>12.6</b>          |                         |                      | <b>5.8</b>             | <b>6.2</b>                      |                         |                      |
| Hispanic           | 19.6            | 16.9<br>(16.7,17.0)  | 2.1                     | 2.2<br>(2.0, 2.4)    | 7.8                    | 8.1<br>(8.0, 8.1)               | 2.3                     | 2.2<br>(2.0, 2.4)    |
| Non-Hispanic       |                 |                      |                         |                      |                        |                                 |                         |                      |
| White              | 9.5             | 7.8<br>(7.7,7.9)     | --                      | --                   | 3.4                    | 3.7<br>(3.6, 3.8)               | --                      | --                   |
| Black              | 10.8            | 7.7<br>(7.0,8.3)     |                         |                      | 4.0                    | 4.9<br>(4.5, 5.2)               |                         |                      |
| Asian <sup>2</sup> | 13.6            | 6.7<br>(5.1,8.4)     |                         |                      | 6.3                    | 8.4<br>(6.6, 10.2) <sup>2</sup> |                         |                      |
| Grouped race       | 22.9            | 10.9<br>(8.7,13.1)   |                         |                      | 5.0                    | 6.4<br>(5.2, 7.7)               |                         |                      |
| Unknown            | 3.4             | --                   |                         |                      | --                     | --                              |                         |                      |

514 <sup>1</sup> Number of cases per 100 persons

515 <sup>2</sup> Number of individuals classified as non-Hispanic Asian is slightly higher than the Holyoke population (based on ACS  
516 2019), potentially leading to inflated case rates

517 <sup>3</sup> 95% confidence intervals constructed using Rubin's rules

518 <sup>4</sup> Rate ratio compares Hispanic to non-Hispanic white population

519 <sup>5</sup> 95% credible intervals obtained from a parametric bootstrap procedure

520 **Table 4.** Holyoke missed SARS-CoV-2 infections comparing case rates from imputed citywide testing  
 521 and seroprevalence from seroepidemiologic study data (March 8, 2020 – December 31, 2020)

|              | Citywide Testing Imputed <sup>1</sup> | Sero-epidemiologic study <sup>2,3</sup> | Number of missed cases per 1,000 people <sup>2,3,4</sup> |
|--------------|---------------------------------------|-----------------------------------------|----------------------------------------------------------|
| Overall      | 6.2                                   | 13.1<br>(6.9, 22.3)                     | 68.5<br>(6.5, 171.1)                                     |
| Hispanic     | 8.1<br>(8.0, 8.1)                     | 16.1<br>(6.2, 31.8)                     | 79.4<br>(0, 239.7)                                       |
| Non-Hispanic |                                       |                                         |                                                          |
| White        | 3.7<br>(3.6, 3.8)                     | 9.4<br>(4.6, 16.4)                      | 59.9<br>(8.6, 125.7)                                     |
| Black        | 4.9<br>(4.5, 5.2)                     | --                                      | --                                                       |
| Asian        | 8.4<br>(6.6, 10.2)                    | --                                      | --                                                       |
| Grouped race | 6.4<br>(5.2, 7.7)                     | --                                      | --                                                       |

522 <sup>1</sup> Uncertainty intervals are (2.5<sup>th</sup>, 97.5<sup>th</sup>) percentiles across 20 imputed datasets

523 <sup>2</sup> Seroprevalence estimates only available for Hispanic and non-Hispanic White groups

524 <sup>3</sup> Uncertainty intervals are 95% credible intervals

525 <sup>4</sup> Lower credible interval range truncated at 0 as negative number of missed infections is not possible

526



527 **Figure 1.** Holyoke census tracts shaded by social vulnerability index with dark blue indicating “high”  
528 vulnerability (>75<sup>th</sup> percentile), light blue indicating “moderate to high” (50-75<sup>th</sup>), light green indicating  
529 “moderate to low” (25-50<sup>th</sup>), and yellow indicating “low” (≤25<sup>th</sup>). Freely available “stop the spread”  
530 testing sites are shown by the stars. Figure was extracted and modified from CDC’s SVI Interactive Map  
531 at <https://svi.cdc.gov/map.html>.

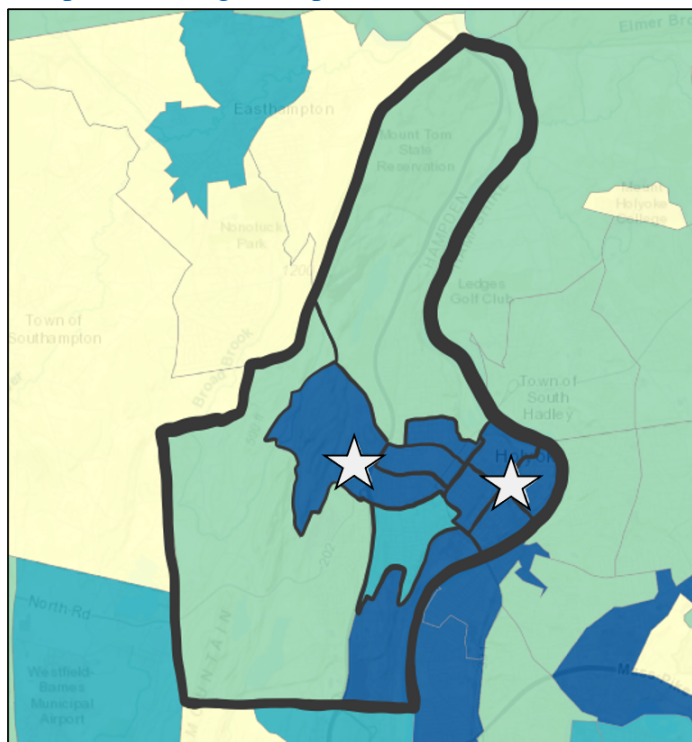

532  
533  
534  
535  
536  
537  
538  
539  
540  
541  
542  
543  
544  
545  
546  
547  
548  
549  
550  
551  
552

553 **Figure 2.** Weekly number of PCR tests per 1,000 population with each census tract. Each line represents  
554 a census tract and color represents low, medium, or high Hispanic population based on ACS 2019.

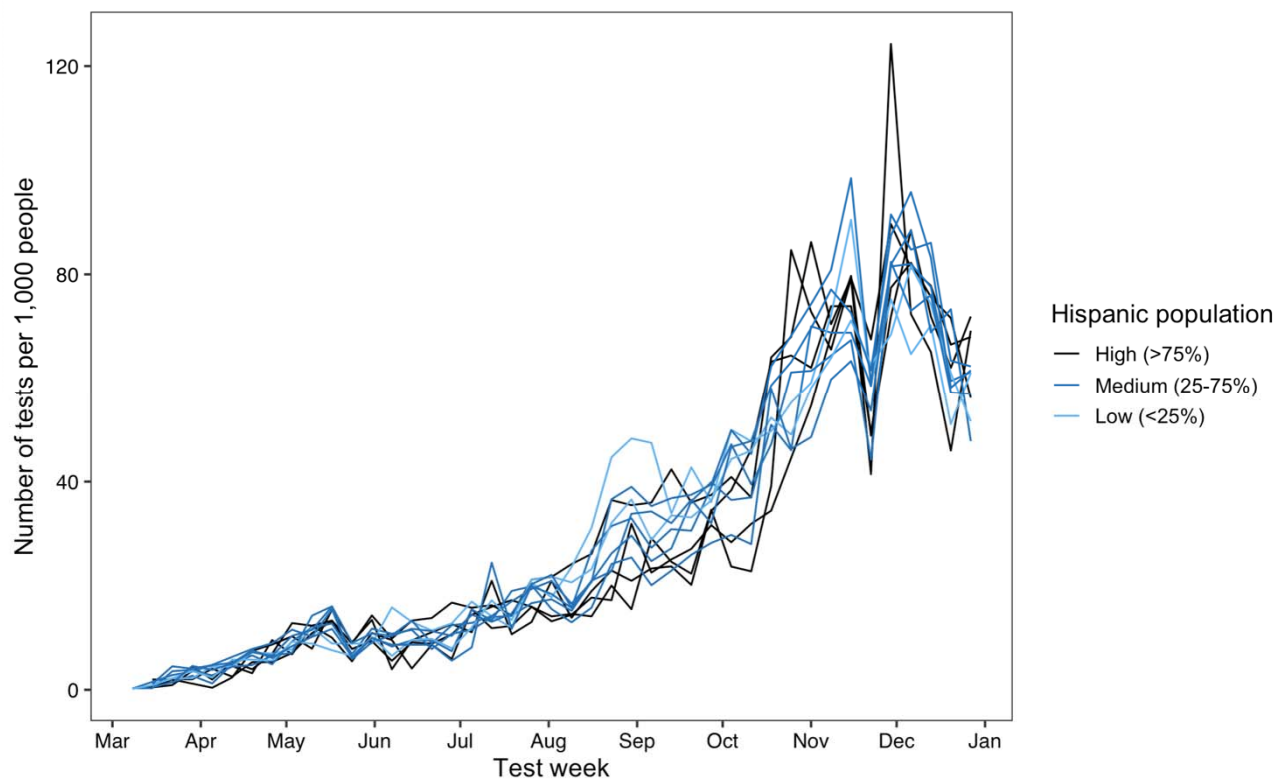

555  
556  
557  
558
